# Supplementary material
Source: PubMed Central journal article supplement (PMC8859697)
Supplement: NIHMS1777589-supplement-1.pdf [file NIHMS1777589-supplement-1.pdf]

**Supplementary Table 1.** Risk of glioma in NHS, NHSII, and HPFS by categories of alcohol intake from specific beverages, mutually adjusted.

|            | Grams Alcohol/Day | Approximate Servings/Week | Total (n=554) |                     |           |
|------------|-------------------|---------------------------|---------------|---------------------|-----------|
|            |                   |                           | Cases         | MV HR <sup>ab</sup> | 95%CI     |
| Beer       | 0-0.5             | 0-<0.25                   | 385           | Ref.                |           |
|            | >0.5-2            | >0.25-1                   | 77            | 1.03                | 0.80-1.33 |
|            | >2-8              | >1-4                      | 66            | 1.26                | 0.94-1.69 |
|            | >8                | >4                        | 26            | 1.06                | 0.69-1.63 |
| Red Wine   | 0-0.5             | 0-<0.25                   | 357           | Ref.                |           |
|            | >0.5-2            | >0.25-1                   | 117           | 1.04                | 0.81-1.34 |
|            | >2-8              | >1-4                      | 68            | 1.08                | 0.78-1.49 |
|            | >8                | >4                        | 12            | 1.14                | 0.61-2.14 |
| White Wine | 0-0.5             | 0-<0.25                   | 310           | Ref.                |           |
|            | >0.5-2            | >0.25-1                   | 148           | 0.93                | 0.73-1.18 |
|            | >2-8              | >1-4                      | 76            | 0.72                | 0.53-1.00 |
|            | >8                | >4                        | 20            | 0.89                | 0.54-1.47 |
| Total Wine | 0-0.5             | 0-<0.25                   | 247           | Ref.                |           |
|            | >0.5-2            | >0.25-1                   | 154           | 0.98                | 0.79-1.21 |
|            | >2-8              | >1-4                      | 103           | 0.77                | 0.59-0.99 |
|            | >8                | >4                        | 50            | 0.89                | 0.63-1.25 |
| Liquor     | 0-0.5             | 0-<0.25                   | 337           | Ref.                |           |
|            | >0.5-2            | >0.25-1                   | 96            | 1.00                | 0.79-1.28 |
|            | >2-8              | >1-4                      | 62            | 0.85                | 0.63-1.14 |
|            | >8                | >4                        | 59            | 0.95                | 0.70-1.29 |

<sup>a</sup>Adjusted for age (months), calendar year, smoking status (never vs. past vs. current), BMI (<25 kg/m<sup>2</sup> vs. ≥25-<30 kg/m<sup>2</sup> vs. ≥30 kg/m<sup>2</sup>), and total caloric intake (quintiles). Each beverage is also mutually adjusted for the others (e.g., beer adjusted for red and white wine and liquor).

<sup>b</sup>Calculated by fixed effect meta-analysis of all three cohorts.

Abbreviations: BMI, body mass index; CI, confidence interval; HPFS, Health Professionals Follow-Up Study; HR, hazard ratio; MV, multivariable; NHS, Nurses' Health Study; NHSII, Nurses' Health Study II

**Supplementary Table 2.** Risk of glioma in NHS, NHSII, and HPFS by alcohol consumption patterns.

|                                      |      | Women |                     |           | Men   |                    |           | Total |                     |           |
|--------------------------------------|------|-------|---------------------|-----------|-------|--------------------|-----------|-------|---------------------|-----------|
|                                      |      | Cases | MV HR <sup>ab</sup> | 95%CI     | Cases | MV HR <sup>a</sup> | 95%CI     | Cases | MV HR <sup>ac</sup> | 95%CI     |
| Days per Week Consume Alcohol        | 0-<2 | 187   | Ref.                |           | 85    | Ref.               |           | 272   |                     |           |
|                                      | ≥2   | 83    | 1.20                | 0.86-1.68 | 86    | 1.11               | 0.72-1.73 | 169   | 1.17                | 0.89-1.52 |
| Maximum Alcoholic Beverages in a Day | 0    | 88    | Ref.                |           | 47    | Ref.               |           | 135   |                     |           |
|                                      | >0-3 | 127   | 1.14                | 0.83-1.57 | 61    | 1.16               | 0.72-1.87 | 188   | 1.15                | 0.88-1.50 |
|                                      | >3-4 | 43    | 1.18                | 0.76-1.83 | 42    | 1.75               | 1.00-3.07 | 85    | 1.37                | 0.97-1.94 |
|                                      | >4   | 5     | 0.90                | 0.34-2.41 | 8     | 1.68               | 0.72-3.88 | 13    | 1.29                | 0.68-2.44 |

<sup>a</sup>Adjusted for age (months), calendar year, smoking status (never vs. past vs. current), BMI (<25 kg/m<sup>2</sup> vs. ≥25-<30 kg/m<sup>2</sup> vs. ≥30 kg/m<sup>2</sup>), total caloric intake (quintiles), and total alcohol intake (0-0.5, >0.5-1.5, >1.5-2, >2-8, >8-15, >15-45 g/d).

<sup>b</sup>Calculated by fixed effect meta-analysis of NHS and NHSII.

<sup>c</sup>Calculated by fixed effect meta-analysis of the three cohorts.

Abbreviations: BMI, body mass index; CI, confidence interval; HPFS, Health Professionals Follow-Up Study; HR, hazard ratio; MV, multivariable; NHS, Nurses' Health Study; NHSII, Nurses' Health Study II;

**Supplementary Table 3.** Risk of glioma in NHS, NHSII, and HPFS by categories of cumulative average total alcohol intake, and separately for alcohol intake from specific beverages, with exclusion of participants who reduced alcohol intake prior to baseline.

|               | Grams Alcohol/Day | Approximate Servings/Week | Women (n=316) |                     |           | Men (n=174) |                    |           | Total (n=490) |                     |           |
|---------------|-------------------|---------------------------|---------------|---------------------|-----------|-------------|--------------------|-----------|---------------|---------------------|-----------|
|               |                   |                           | Cases         | MV HR <sup>ab</sup> | 95%CI     | Cases       | MV HR <sup>a</sup> | 95%CI     | Cases         | MV HR <sup>ac</sup> | 95%CI     |
| Total Alcohol | 0-0.5             | 0-<0.25                   | 106           | Ref.                |           | 30          | Ref.               |           | 136           | Ref.                |           |
|               | >0.5-2            | >0.25-1                   | 66            | 0.97                | 0.71-1.33 | 17          | 0.64               | 0.35-1.17 | 83            | 0.89                | 0.68-1.18 |
|               | >2-8              | >1-4                      | 87            | 1.06                | 0.79-1.42 | 43          | 0.66               | 0.41-1.07 | 130           | 0.93                | 0.73-1.20 |
|               | >8-15             | >4-7.5                    | 36            | 0.93                | 0.63-1.37 | 30          | 0.62               | 0.37-1.05 | 66            | 0.80                | 0.59-1.10 |
|               | >15               | >7.5                      | 21            | 0.59                | 0.36-0.96 | 54          | 0.86               | 0.53-1.38 | 75            | 0.71                | 0.51-1.00 |
| Beer          | 0-0.5             | 0-<0.25                   | 244           | Ref.                |           | 75          | Ref.               |           | 319           | Ref.                |           |
|               | >0.5-2            | >0.25-1                   | 39            | 0.99                | 0.70-1.39 | 48          | 1.25               | 0.86-1.81 | 87            | 1.10                | 0.86-1.42 |
|               | >2-8              | >1-4                      | 28            | 1.28                | 0.84-1.93 | 33          | 1.10               | 0.72-1.67 | 61            | 1.18                | 0.88-1.59 |
|               | >8                | >4                        | 5             | 0.69                | 0.28-1.68 | 18          | 1.16               | 0.68-1.97 | 23            | 1.01                | 0.64-1.60 |
| Red Wine      | 0-0.5             | 0-<0.25                   | 216           | Ref.                |           | 89          | Ref.               |           | 305           | Ref.                |           |
|               | >0.5-2            | >0.25-1                   | 64            | 0.94                | 0.71-1.25 | 44          | 1.03               | 0.71-1.49 | 108           | 0.97                | 0.78-1.22 |
|               | >2-8              | >1-4                      | 33            | 0.86                | 0.59-1.26 | 32          | 1.02               | 0.67-1.54 | 65            | 0.93                | 0.70-1.23 |
|               | >8                | >4                        | 3             | 0.57                | 0.18-1.80 | 9           | 1.37               | 0.68-2.75 | 12            | 1.08                | 0.59-1.96 |
| White Wine    | 0-0.5             | 0-<0.25                   | 182           | Ref.                |           | 78          | Ref.               |           | 260           | Ref.                |           |
|               | >0.5-2            | >0.25-1                   | 80            | 0.95                | 0.73-1.24 | 60          | 1.05               | 0.74-1.48 | 140           | 0.99                | 0.80-1.22 |
|               | >2-8              | >1-4                      | 47            | 0.85                | 0.61-1.18 | 24          | 0.63               | 0.40-1.00 | 71            | 0.77                | 0.59-1.01 |
|               | >8                | >4                        | 7             | 0.53                | 0.25-1.14 | 12          | 1.48               | 0.79-2.74 | 19            | 0.98                | 0.61-1.59 |
| Total Wine    | 0-0.5             | 0-<0.25                   | 149           | Ref.                |           | 52          | Ref.               |           | 201           | Ref.                |           |
|               | >0.5-2            | >0.25-1                   | 88            | 0.96                | 0.73-1.25 | 58          | 1.26               | 0.86-1.85 | 146           | 1.05                | 0.84-1.30 |
|               | >2-8              | >1-4                      | 62            | 0.89                | 0.65-1.20 | 33          | 0.69               | 0.44-1.08 | 95            | 0.82                | 0.64-1.05 |
|               | >8                | >4                        | 17            | 0.59                | 0.35-0.98 | 31          | 1.41               | 0.89-2.23 | 48            | 0.95                | 0.68-1.34 |
| Liquor        | 0-0.5             | 0-<0.25                   | 207           | Ref.                |           | 75          | Ref.               |           | 282           | Ref.                |           |
|               | >0.5-2            | >0.25-1                   | 55            | 1.03                | 0.76-1.39 | 38          | 1.11               | 0.75-1.65 | 93            | 1.06                | 0.83-1.34 |
|               | >2-8              | >1-4                      | 34            | 1.04                | 0.71-1.51 | 25          | 0.66               | 0.42-1.06 | 59            | 0.87                | 0.65-1.17 |
|               | >8                | >4                        | 20            | 0.86                | 0.53-1.38 | 36          | 1.10               | 0.72-1.68 | 56            | 0.99                | 0.72-1.35 |

<sup>a</sup>Adjusted for age (months), calendar year, BMI (<25 kg/m<sup>2</sup> vs. ≥25-<30 kg/m<sup>2</sup> vs. ≥30 kg/m<sup>2</sup>), smoking status (never vs. past vs. current), and total caloric intake (quintiles).

<sup>b</sup>Calculated by fixed effect meta-analysis of NHS and NHSII.

<sup>c</sup>Calculated by fixed effect meta-analysis of all three cohorts.

Abbreviations: BMI, body mass index; CI, confidence interval; HPFS, Health Professionals Follow-Up Study; HR, hazard ratio; MV, multivariable; NHS, Nurses' Health Study; NHSII, Nurses' Health Study II;
